# Supplementary material
Source: publisher site journal article supplement (https://static.cambridge.org/content/id/urn:cambridge.org:id:article:S1041610220001763/resource/name/S1041610220001763supp002.pdf)
Supplement: Supplementary file 1 [file S1041610220001763supp002.pdf]

## Full Text reviews coding and reliability

Review of papers found via scopus citations and references from the 10 included papers from 2015 search and 2 review papers

\* Required

1. **Database Search ID February 2018 \***

---

2. **Reliability Code number**

---

3. **Citation \***

---

4. **Date assessed for this review \***

---

*Example: December 15, 2012*

5. **Coding Personnel \***

*Mark only one oval.*

Steve

Premilla

6. **Type of report \***

*Mark only one oval.*

Peer reviewed published research paper

exclude: Review

exclude: Letter or Editorial

exclude: Case Report

exclude: Duplicate sample and results

exclude: conference proceedings

**7. Type of Hospitalisation exposure for most of study sample \***

Mark only one oval.

- Acute hospitalisation for physical illness (not psychiatric or rehabilitation): this could be only medical patients (non-surgical) or mixed medical and surgical
- exclude: Mainly surgical: study sets out to investigate a surgical sample
- exclude: Mainly critical care: study sets out to investigate in intensive care population (ICU/critical care/post-arrest patients/sepsis)
- exclude: Rehabilitation: rehab admission investigated without reference to preceding acute hospitalisation exposure
- exclude: Psychiatric: should be obvious...usually ECT/schizophrenia/anxiety /depression/psychogeriatrics
- exclude: Primary neurological: usually stroke (hopefully these have been filtered out already from title and abstract)
- exclude: day or non-acute admission
- exclude: other (if doesn't fall into any of the above categories)

**8. Comparison Group Included \***

Mark only one oval.

- Study has an intervention group and a matched control group
- Study has a longitudinal cohort allowing comparison between hospitalised and non-hospitalised participants
- Pre-hospitalisation measure and >1 post-discharge measure
- Sample recruited from inpatients with >1 post-discharge measures
- exclude: only one post-admission measure and no control group
- exclude: only inpatient measure, no post discharge measure
- exclude: other (if doesn't fall into any of the above categories)

**9. Included in Review \***

Mark only one oval.

- Yes
- No

**10. Notes about reference**

---
